# Supplementary material for: Small-molecule inhibitor targeting orphan nuclear receptor COUP-TFII for prostate cancer treatment
Source: PubMed Central journal article supplement — Sci Adv. 2020 Apr 29;6(18):eaaz8031. doi: 10.1126/sciadv.aaz8031 (PMC7190335; doi:10.1126/sciadv.aaz8031), 2020-04-29
Supplement: aaz8031_SM.pdf [file aaz8031_SM.pdf]

## Supplementary Materials for

### **Small-molecule inhibitor targeting orphan nuclear receptor COUP-TFII for prostate cancer treatment**

Leiming Wang, Chiang-Min Cheng, Jun Qin, Mafei Xu, Chung-Yang Kao, Jingjing Shi, Erli You, Wanchun Gong, Laura Pedro Rosa, Peter Chase, Louis Scampavia, Franck Madoux, Timothy Spicer, Peter Hodder, H. Eric Xu, Sophia Y. Tsai\*, Ming-Jer Tsai\*

\*Corresponding author. Email: [stsai@bcm.edu](mailto:stsai@bcm.edu) (S.Y.T.); [mtsai@bcm.edu](mailto:mtsai@bcm.edu) (M.-J.T.)

Published 29 April 2020, *Sci. Adv.* **6**, eaaz8031 (2020)

DOI: 10.1126/sciadv.aaz8031

#### **This PDF file includes:**

Figs. S1 to S7

Tables S1 and S2

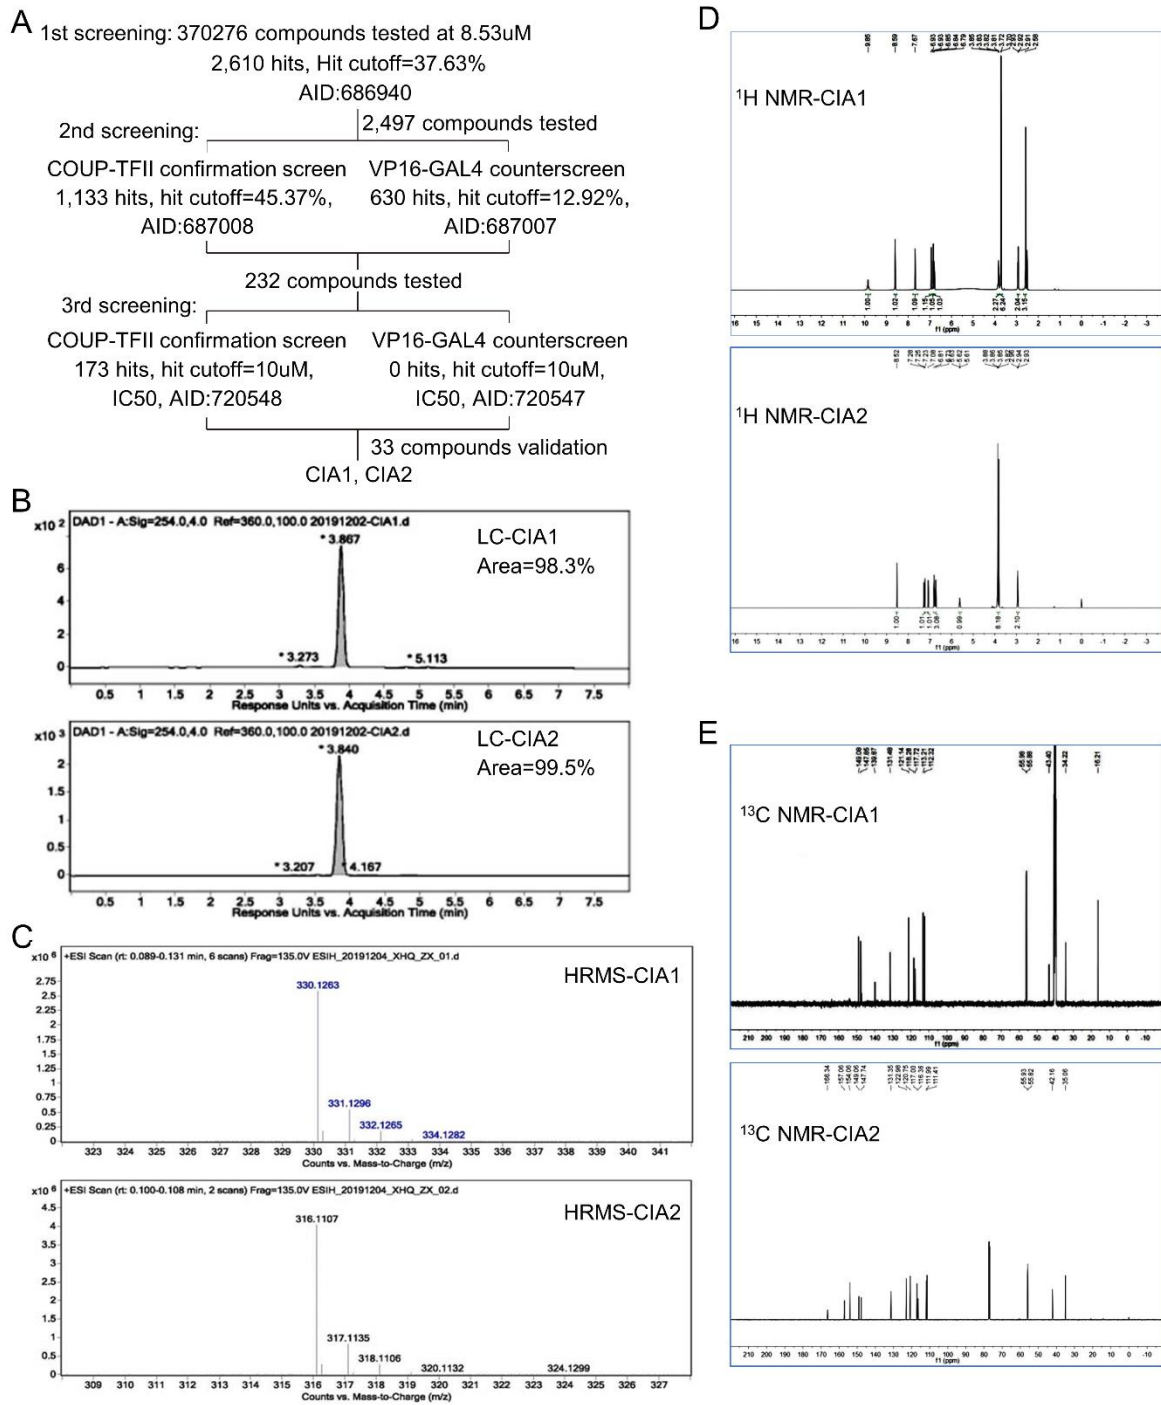

**Fig. S1. Identification of COUP-TFII small molecule inhibitors.** (A) Schematic of screening process. Each individual assay (AID) was deposited to the PubChem database. LC (B), HRMS (C), <sup>1</sup>H NMR (D) and <sup>13</sup>C NMR (E) analysis of CIA1 and CIA2.

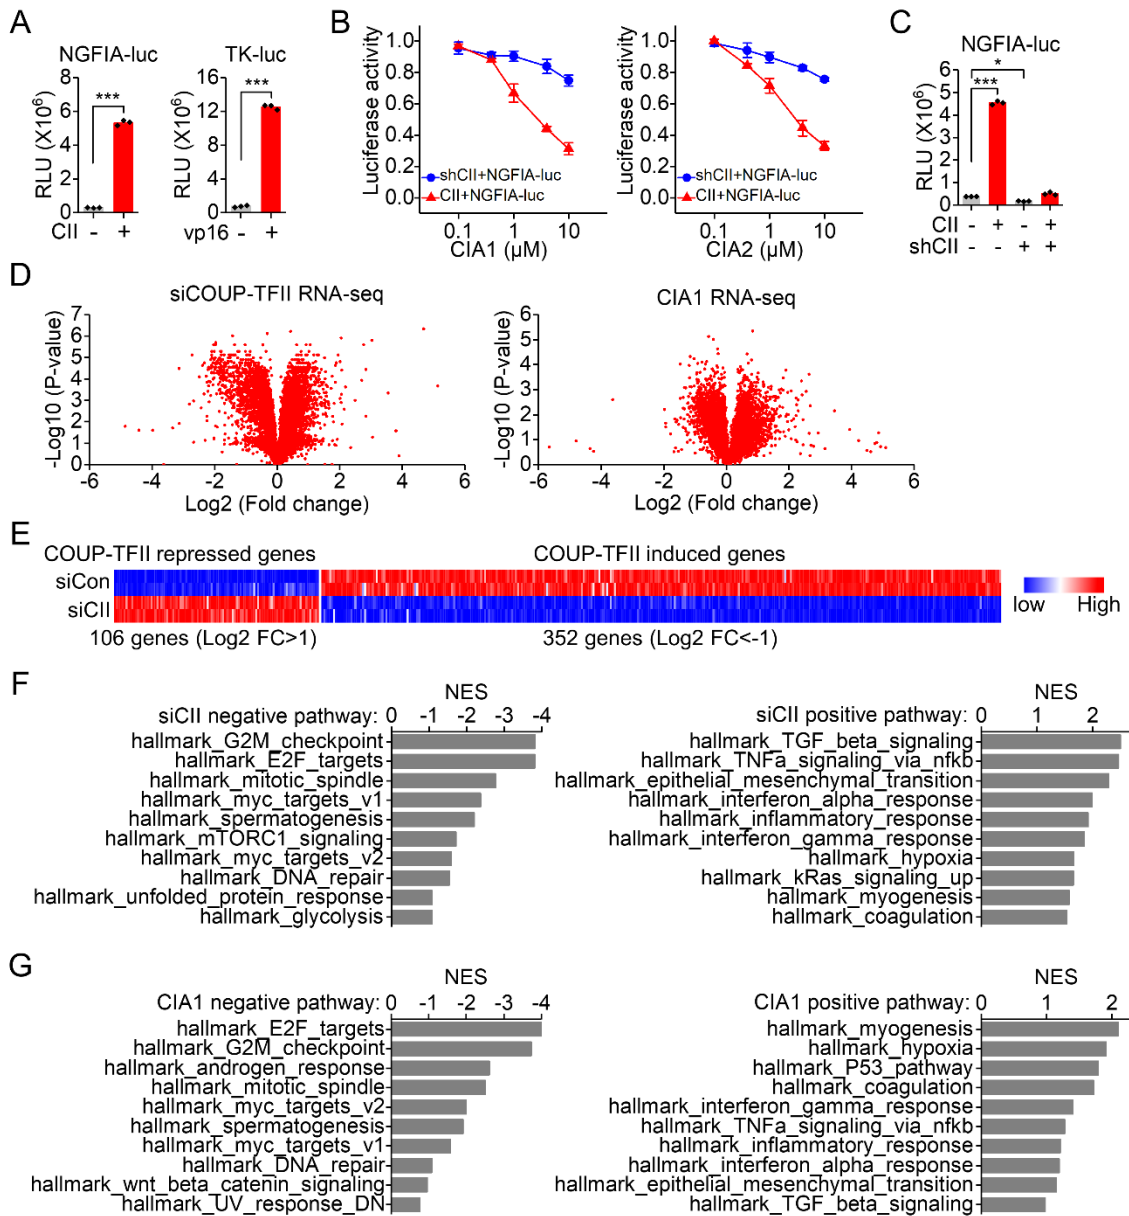

**Fig. S2. Targeting COUP-TFII by the inhibitors.** (A) RLU (relative luminescence unit) of luciferase assay in Fig. 1D.  $n=3$  per group.  $t$  test. (B) 293T cells that transfected with NGFIA-Luc and COUP-TFII (CII) or shCOUP-TFII (shCII) were treated with CIA1 or CIA2 for 18 hours. Luciferase assay were performed. RLU of luciferase assay was shown in (C).  $n=3$  per group. Two-way ANOVA. (D) Volcano plot of dysregulated genes in LNCaP cells that transfected with siCOUP-TFII for 72 hours, or treated with 1  $\mu\text{M}$  CIA1 for 18 hours. RNA sequencing was performed. (E) COUP-TFII repressed and induced gene signatures were generated by dysregulated genes after COUP-TFII knockdown. GSEA showed the top Hallmark pathways regulated by COUP-TFII (F) or CIA1 (G). \* $P < 0.05$ , \*\*\* $P < 0.001$ .

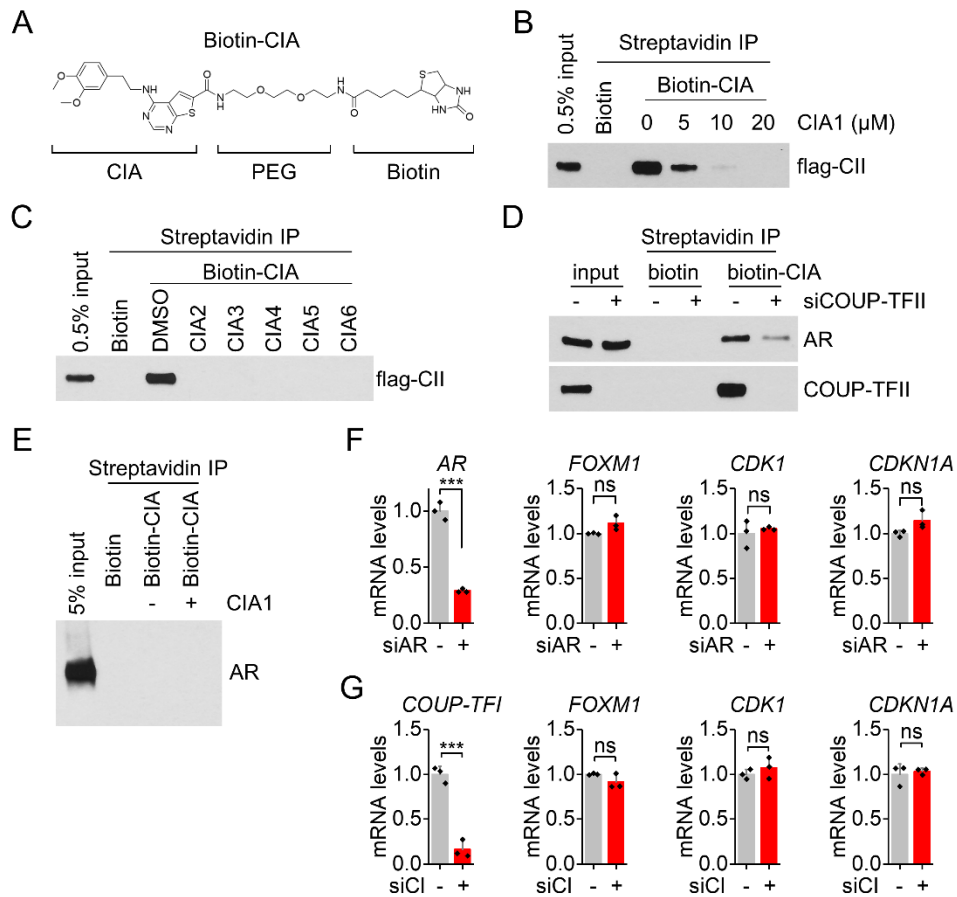

**Fig. S3. The direct interaction between the inhibitor and COUP-TFII protein.** (A) Structure of biotinylated inhibitor. (B) Biotinylated inhibitor pulldown assay using overexpressed COUP-TFII in 293T cells. Different doses of CIA1 was used as competitor. (C) Biotinylated inhibitor pulldown assay using overexpressed COUP-TFII in 293T cells. 20 μM different active CIA1 analogues were used as competitor. (D) LNCaP cells were transfected with siCOUP-TFII for 72 hours. Biotinylated inhibitor pulldown assay was performed using the cell lysate. (E) Biotinylated inhibitor pulldown assay using purified AR protein. 20 μM CIA1 was used as competitor. qPCR analysis of indicated genes in LNCaP cells at 72 hours after siAR treatment (F) or siCOUP-TFI (siCI) treatment (G). n=3 per group. t test, ns=P>0.05, \*\*\*P<0.001.

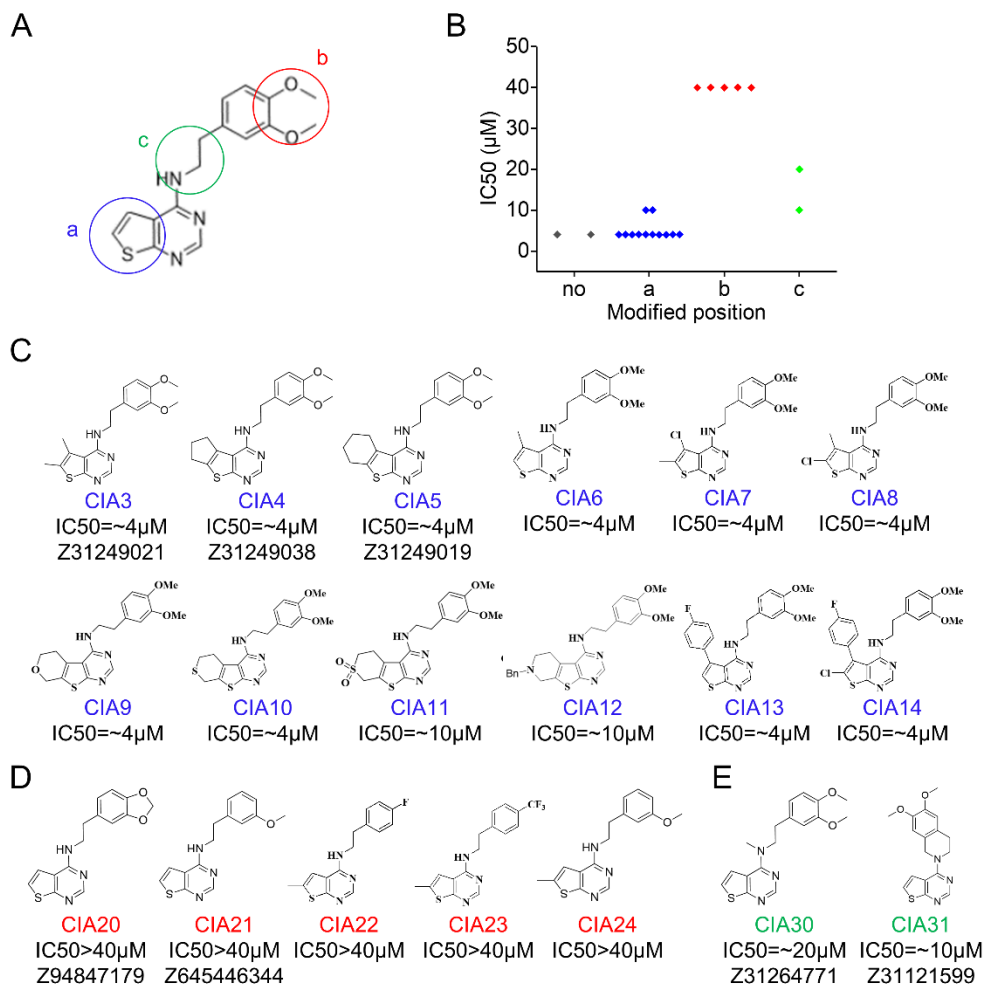

**Fig. S4. Screening of CIA1 and CIA2 analogues.** (A) Modified position as shown on CIA2. a: on the thienopyrimidine ring; b: on the dimethoxybenzene ring; c: on the linker chain. (B) IC<sub>50</sub> value distribution of compounds by luciferase assay. no: no modification (CIA1 and CIA2). 293T cells that transfected with COUP-TFII and NGFIA-Luc were treated with compound for 18 hours. Luciferase assay was performed to calculate IC<sub>50</sub>. Detailed structure and IC<sub>50</sub> of test compounds with modification on the thienopyrimidine ring (C), the dimethoxybenzene ring (D), the linker chain (E) were shown.

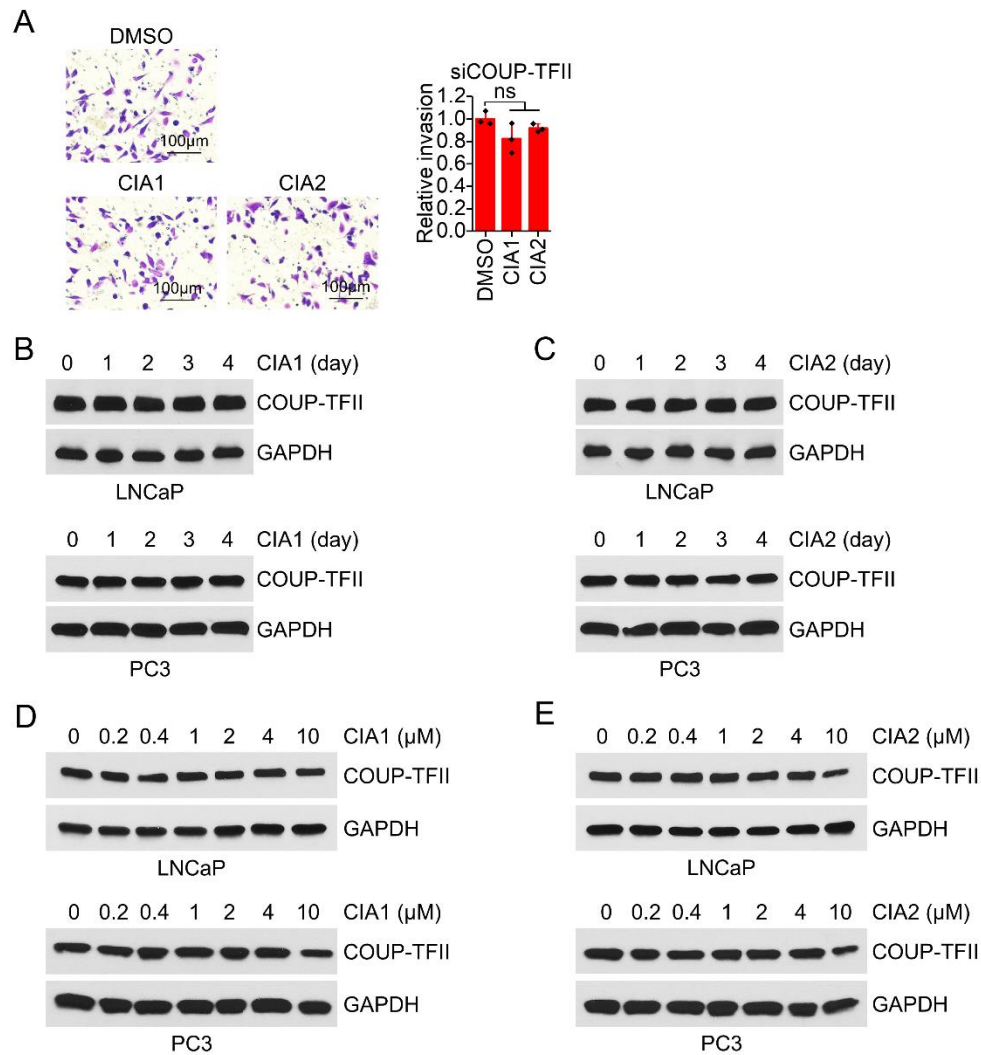

**Fig. S5. Related to Fig. 3.** (A) PC3 cells were transfected with siCOUP-TFII for 24 hours, then treated with 1  $\mu$ M CIA1 or CIA2 for 48 hours. Invasion was measured by transwell assay.  $n=3$  per group. One-way ANOVA.  $ns=P>0.05$ . Time course: No apparent changes in levels of COUP-TFII protein to 1  $\mu$ M CIA1 (B) or 1  $\mu$ M CIA2 (C) treatments in cells for indicated time periods as shown by western blot analysis of COUP-TFII. Dose response: No obvious changes in COUP-TFII protein levels upon treatments with indicated concentrations of CIA1 (D) or CIA2 (E) in cells for 4 days as shown by western blot analysis of COUP-TFII.

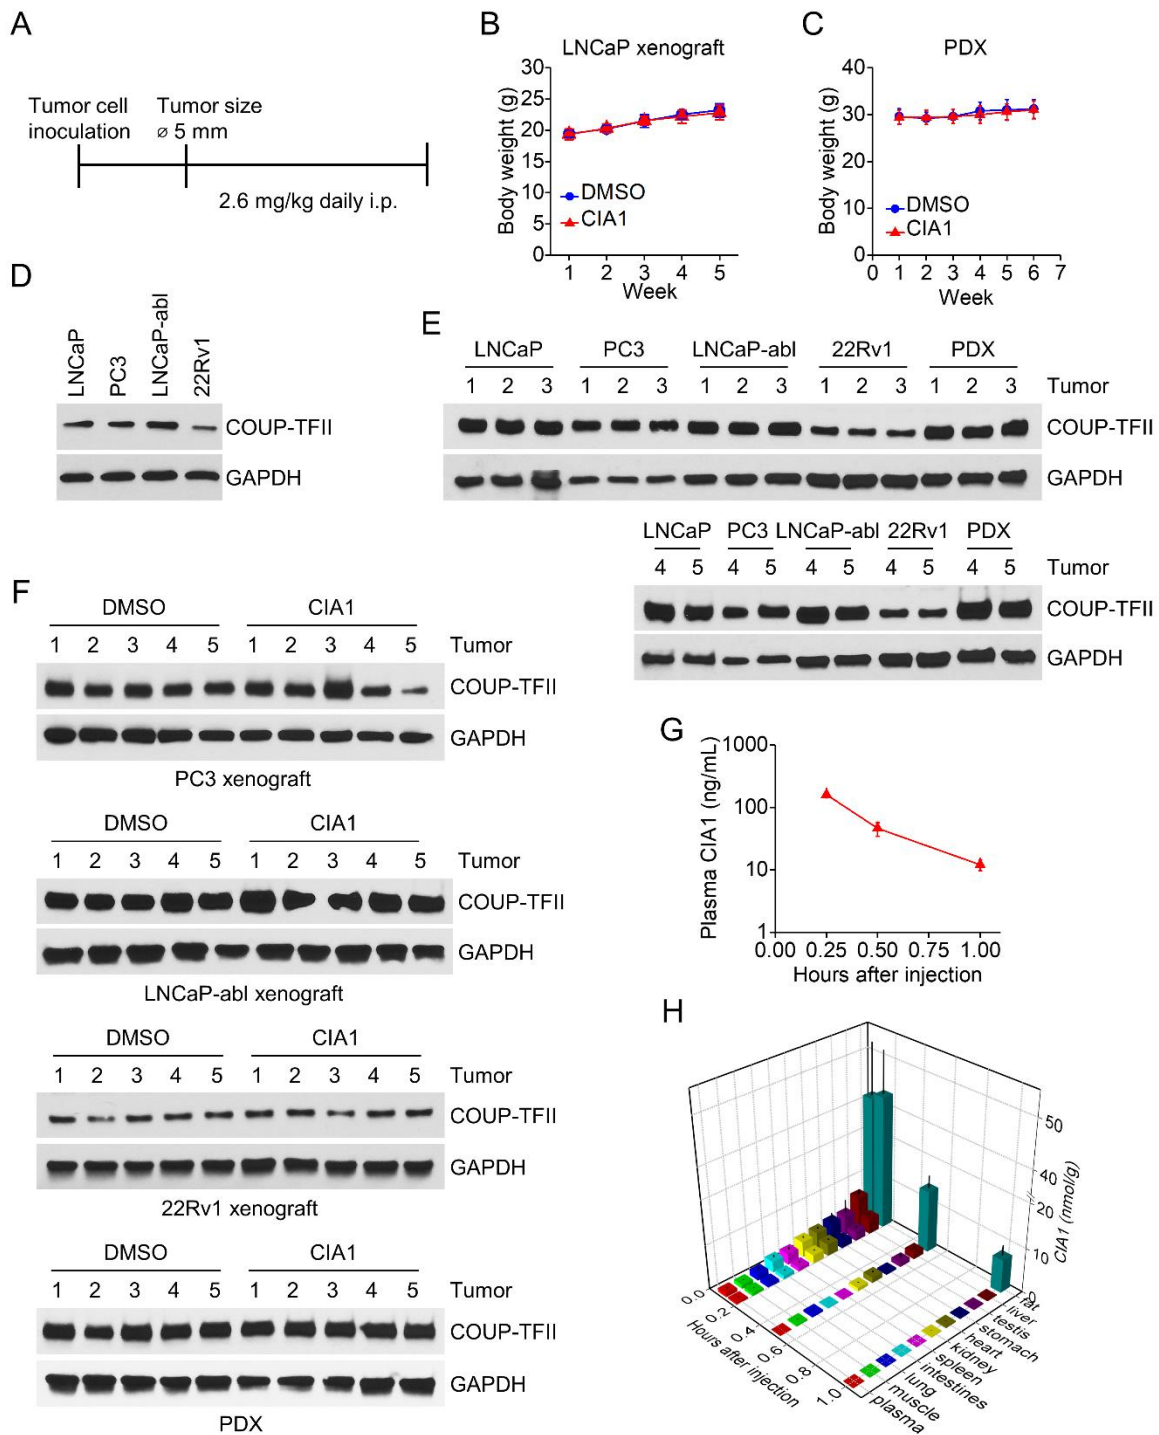

**Fig. S6. CIA1 treatment in mice.** (A) Treatment diagram for xenograft mice. The body weight of LNCaP xenograft bearing mice (B) and PDX mice (C) after CIA1 treatment.  $n=5$  per group. Western blot analysis of COUP-TFII protein levels in prostate cancer cell lines (D) and xenograft tumors that treated with DMSO (E). (F) Western blot analysis of COUP-TFII protein levels in xenograft tumors after CIA1 treatment. (G) DMPK assay of CIA1 in mouse plasma after intraperitoneal injection. (H) Tissue distribution of CIA1 in mouse after intraperitoneal injection.



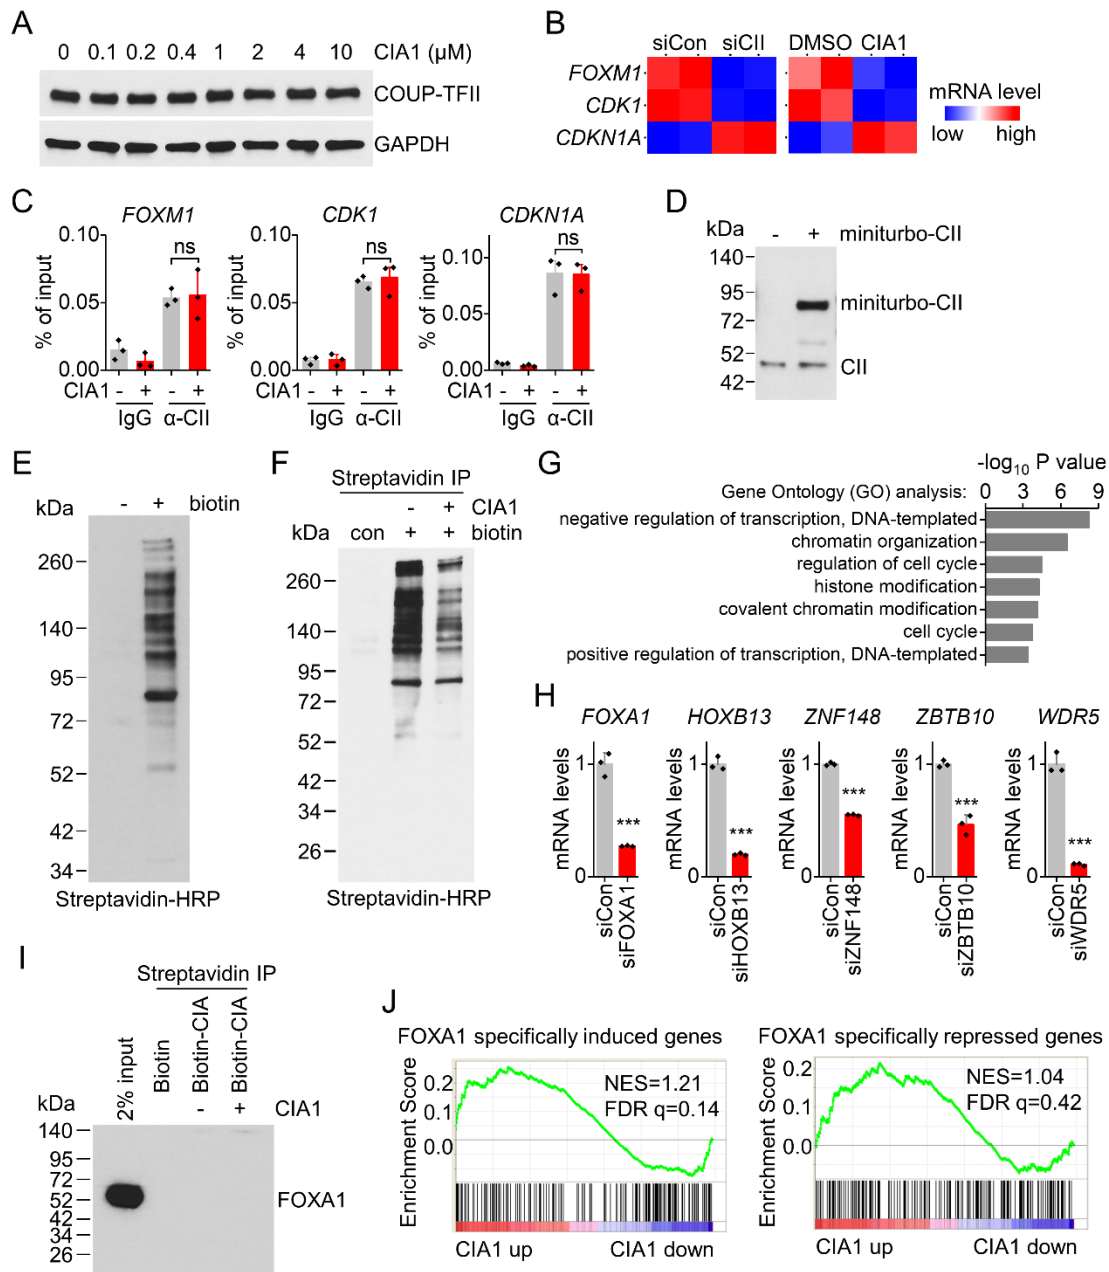

**Fig. S7. Disrupted COUP-TFII binding to FOXA1 by CIA1.** (A) LNCaP cells were treated with CIA1 for 18 hours. Western blot was performed. (B) Heatmap of CIA1 regulated COUP-TFII target genes as indicated in RNA sequencing. (C) LNCaP cells were treated with 4  $\mu\text{M}$  CIA1 for 12 hours. ChIP-qPCR were performed. n=3 per group. Two-way ANOVA. (D) Western blot analysis of overexpressed miniturbo-COUP-TFII in LNCaP cells. (E) LNCaP/miniturbo-COUP-TFII cells were treated with 400  $\mu\text{M}$  biotin for 4 hours. Western blot was performed with streptavidin-HRP antibody. (F) LNCaP/miniturbo-COUP-TFII cells were treated with 4  $\mu\text{M}$  CIA1 for 3 hours, then 400  $\mu\text{M}$  biotin for 4 hours. Cell lysate was immunoprecipitated with streptavidin beads. (G) Gene ontology (GO) analysis of CIA1 reduced COUP-TFII binding proteins. (H) Knockdown efficacy of siRNA in Fig. 6C. n=3 per group. t test. (I) FOXA1 purified protein was immunoprecipitated with biotinylated inhibitor. 20  $\mu\text{M}$  CIA1 was used as competitor. (J) GSEA of FOXA1 specifically regulated signature with CIA1 regulated genes. FOXA1 specifically regulated genes were generated by removing COUP-TFII regulated genes from FOXA1 gene signature (GSE37314).



Table S1. Reduced COUP-TFII binding proteins by CIA1 treatment.

| Gene ID | Gene Symbol | negative control |      | DMSO |      | CIA1 |      |
|---------|-------------|------------------|------|------|------|------|------|
|         |             | SAF              | IBAQ | SAF  | IBAQ | SAF  | IBAQ |
| 25873   | RPL36       | 0                | 0    | 667  | 24   | 0    | 0    |
| 3169    | FOXA1       | 0                | 0    | 357  | 15.8 | 0    | 0    |
| 90861   | JPT2        | 0                | 0    | 333  | 11.9 | 0    | 0    |
| 6159    | RPL29       | 0                | 0    | 250  | 10.2 | 0    | 0    |
| 10481   | HOXB13      | 0                | 0    | 273  | 9.3  | 0    | 0    |
| 7707    | ZNF148      | 0                | 0    | 179  | 6.1  | 0    | 0    |
| 65986   | ZBTB10      | 0                | 0    | 116  | 4.8  | 0    | 0    |
| 3066    | HDAC2       | 0                | 0    | 87   | 3.9  | 43.5 | 0.25 |
| 283431  | GAS2L3      | 0                | 0    | 103  | 2.2  | 0    | 0    |
| 5173    | PDYN        | 0                | 0    | 76.9 | 2.1  | 0    | 0    |
| 10726   | NUDC        | 0                | 0    | 90.9 | 1.7  | 0    | 0    |
| 4781    | NFIB        | 87               | 0    | 217  | 1.5  | 130  | 0    |
| 5335    | PLCG1       | 0                | 0    | 14.5 | 1.4  | 0    | 0    |
| 8649    | LAMTOR3     | 0                | 0    | 143  | 1.3  | 0    | 0    |
| 4129    | MAOB        | 69               | 0    | 69   | 1.2  | 34.5 | 0    |
| 5304    | PIP         | 0                | 0    | 111  | 1.2  | 0    | 0    |
| 80895   | ILKAP       | 0                | 0    | 83.3 | 1    | 0    | 0    |
| 200010  | SLC5A9      | 0                | 0    | 36.4 | 0.94 | 0    | 0    |
| 5987    | TRIM27      | 0                | 0    | 35.7 | 0.84 | 0    | 0    |
| 4774    | NFIA        | 79.2             | 0    | 317  | 0.82 | 119  | 0    |
| 202559  | KHDRBS2     | 0                | 0    | 66.7 | 0.78 | 66.7 | 0    |
| 3936    | LCPI1       | 26.3             | 0    | 52.6 | 0.77 | 0    | 0    |
| 1108    | CHD4        | 10.3             | 0.05 | 41.2 | 0.77 | 0    | 0    |
| 9667    | SAFB2       | 0                | 0    | 97.6 | 0.65 | 73.2 | 0    |
| 3054    | HCFC1       | 11.2             | 0    | 44.9 | 0.63 | 0    | 0    |
| 5621    | PRNP        | 0                | 0    | 71.4 | 0.61 | 0    | 0    |
| 11091   | WDR5        | 0                | 0    | 62.5 | 0.6  | 0    | 0    |
| 80347   | COASY       | 0                | 0    | 42.7 | 0.57 | 0    | 0    |
| 6643    | SNX2        | 0                | 0    | 35.7 | 0.56 | 0    | 0    |
| 5496    | PPM1G       | 0                | 0    | 33.3 | 0.43 | 0    | 0    |
| 10009   | ZBTB33      | 0                | 0    | 26.3 | 0.43 | 0    | 0    |
| 6015    | RING1       | 0                | 0    | 55.6 | 0.37 | 0    | 0    |
| 6045    | RNF2        | 0                | 0    | 55.6 | 0.37 | 0    | 0    |
| 58490   | RPRD1B      | 0                | 0    | 58.8 | 0.36 | 0    | 0    |
| 84277   | DNAJC30     | 0                | 0    | 83.3 | 0.31 | 0    | 0    |
| 84549   | MAK16       | 0                | 0    | 66.7 | 0.31 | 0    | 0    |
| 79977   | GRHL2       | 0                | 0    | 30.3 | 0.26 | 0    | 0    |
| 8841    | HDAC3       | 0                | 0    | 38.5 | 0.24 | 0    | 0    |
| 6640    | SNTA1       | 0                | 0    | 37   | 0.24 | 0    | 0    |
| 23011   | RAB21       | 0                | 0    | 71.4 | 0.23 | 0    | 0    |

|        |        |      |   |      |      |      |   |
|--------|--------|------|---|------|------|------|---|
| 5770   | PTPN1  | 0    | 0 | 34.5 | 0.21 | 0    | 0 |
| 6641   | SNTB1  | 0    | 0 | 30.3 | 0.19 | 0    | 0 |
| 79009  | DDX50  | 25.6 | 0 | 25.6 | 0.17 | 0    | 0 |
| 8971   | H1-10  | 0    | 0 | 83.3 | 0.16 | 0    | 0 |
| 10250  | SRRM1  | 0    | 0 | 23.8 | 0.14 | 0    | 0 |
| 5777   | PTPN6  | 0    | 0 | 27.5 | 0.13 | 0    | 0 |
| 7874   | USP7   | 0    | 0 | 14.9 | 0.13 | 0    | 0 |
| 4673   | NAP1L1 | 0    | 0 | 62.5 | 0.12 | 0    | 0 |
| 1759   | DNM1   | 21.1 | 0 | 21.1 | 0.12 | 0    | 0 |
| 2961   | GTF2E2 | 0    | 0 | 55.6 | 0.11 | 0    | 0 |
| 1503   | CTPS1  | 0    | 0 | 30.3 | 0.11 | 0    | 0 |
| 55746  | NUP133 | 0    | 0 | 16.1 | 0.11 | 0    | 0 |
| 9945   | GFPT2  | 0    | 0 | 23.3 | 0.1  | 23.3 | 0 |
| 254048 | UBN2   | 0    | 0 | 15.6 | 0.09 | 0    | 0 |
| 64324  | NSD1   | 0    | 0 | 7.2  | 0.06 | 0    | 0 |
| 7402   | UTRN   | 0    | 0 | 5.5  | 0.03 | 0    | 0 |
| 63922  | CHTF18 | 0    | 0 | 20.8 | 0.01 | 0    | 0 |

SAF: spectral abundance factor; IBAQ: intensity based absolute quantification.

Table S2. siRNAs and primers for qRT-PCR and ChIP-qPCR.

|                                                  |
|--------------------------------------------------|
| siRNA                                            |
| universal negative control siRNA: Sigma (SIC001) |
| siCOUP-TFII-1: GGCCGUAUAUGGCAAUUCA               |
| siCOUP-TFII-2: GUACCUGUCCGGAUAUAUU               |
| siFOXA1-1: GAGAGAAAAAAUCAACAGC                   |
| siFOXA1-2: CCAGACGGGUUCAUUAUU                    |
| siCOUP-TFI-1: CAAUCCAGGCCAGUACGCA                |
| siCOUP-TFI-2: CCAACAACAUUAUGGGCAU                |
| siAR-1: GACCUACCGAGGAGCUUUC                      |
| siAR-2: UCAAGGAACUCGAUCGUAU                      |
| siHOXB13: SASI Hs01 00032419 from Sigma          |
| siZNF148: SASI Hs01 00093930 from Sigma          |
| siZNF148: SASI Hs01 00093935 from Sigma          |
| siZBTB10: SASI Hs02 00324282 from Sigma          |
| siZBTB10: SASI Hs02 00324284 from Sigma          |
| siWDR5: SASI Hs01 00046875 from Sigma            |
|                                                  |
| qRT-PCR primer                                   |
| ACTB-F: TGGCATTGCCGACAGGAT                       |
| ACTB-R: GCTCAGGAGGAGCAATGATCT                    |
| FOXM1-F: GGAGCAGCGACAGGTAAAGG                    |
| FOXM1-R: GTTGATGGCGAATT GTATCATGG                |
| CDK1-F: GCGCGGATCTACCATACCC                      |
| CDK1-R: CATGGCTAC CACTTGACCTGT                   |
| CDKN1A-F: ACCTCCTCTAAGGTTGGGCA                   |
| CDKN1A-R: TGCCTTCACAAGACAGAGGG                   |
| FOXA1-F: CTACTACGCAGACACGCAGG                    |
| FOXA1-R: CCGCTCGTAGTCATGGTGTT                    |
| HOXB13-F: GCGAGCTGGGAGCGATTTA                    |
| HOXB13-R: CTCCCAGCAAGCCTTCGATA                   |
| ZNF148-F: GAAACGTAGTGGGAGTGCGA                   |
| ZNF148-R: CTCAAGACTCCTCCACAGCC                   |
| ZBTB10-F: GGGGAGCCCACATAGCATT                    |
| ZBTB10-R: TGGTCCCAATCATGACCCCT                   |
| WDR5-F: TGTGAAGTTCTCCCCGAACG                     |
| WDR5-R: GTGGCCAGTGTACGTCTTCA                     |
| AR-F: CAGTGGATGGGCTGAAAAAT                       |
| AR-R: GGAGCTTGGTGAGCTGGTAG                       |
| COUP-TFI-F: ATCGTGCTGTTACGTCAGAC                 |
| COUP-TFI-R: TGGCTCCTCACGTA CTCTC                 |
|                                                  |
| ChIP-qPCR primer                                 |
| CII-FOXM1-F: CGACTGTGGCTGAGATGAAG                |

|                                      |
|--------------------------------------|
| CII-FOXMI-F: GTAAGATGGAGGCGGTGTTG    |
| CII-CDK1-F: GGCGGTCTTTTGAGTTTTCCA    |
| CII-CDK1-R: ACATCGAGATTCCATTACTTTCCT |
| CII-CDKN1A-F: GCTGTATGACTCAGGGGCAA   |
| CII-CDKN1A-R: CTCACCCCACTGCTTGTGAT   |
